# Supplementary material for: Unveiling chemical reactivity and oxidation of 1T-phased group VI disulfides
Source: Royal Society of Chemistry journal article supplement (doi:10.1039/c9cp02985k), 2019-01-01
Supplement: c9cp02985k1.pdf [file c9cp02985k1.pdf]

## Supporting information for

### Unveiling Chemical Reactivity and Oxidation of 1T Phased Group VI Disulfide

Qiang Li, †,<sup>a</sup> Li Shi, †,<sup>a</sup> Ruchun Wu,<sup>\*b</sup> Chongyi Lin,<sup>a</sup> Xiaowan Bai,<sup>a</sup> Yixin Ouyang,<sup>a</sup> Bhumi A. Baraiya,<sup>c</sup> Prafulla K. Jha<sup>c</sup> and Jinlan Wang<sup>\*a</sup>

<sup>a</sup> School of Physics, Southeast University, Nanjing 211189, China.

<sup>b</sup> School of Chemistry and Chemical Engineering, Guangxi University for Nationalities, Guangxi Key Laboratory of Chemistry and Engineering of Forest Products, Nanning, Guangxi 530006, China.

<sup>c</sup> Department of Physics, Faculty of Science, The Maharaja Sayajirao University of Baroda, Vadodara-390 002, India.

\*E-mail: wurc2015@163.com; jlwang@seu.edu.cn.

†These authors contributed equally to this work.

## Table of Contents

|                                                                               |    |
|-------------------------------------------------------------------------------|----|
| 1. Band structures of $MS_2$ .....                                            | 3  |
| 2. Computational models.....                                                  | 4  |
| 3. Pristine surface .....                                                     | 5  |
| 3.1 $H_2O$ adsorption on pristine surfaces of $MS_2$ .....                    | 5  |
| 3.2 $O_2$ adsorption on pristine surfaces of $MS_2$ .....                     | 6  |
| 4. Sulfur vacancy .....                                                       | 7  |
| 4.1 $H_2O$ adsorption on sulfur vacancy sites of $MS_2$ .....                 | 7  |
| 4.2 $O_2$ adsorption on sulfur vacancy sites of $MS_2$ .....                  | 8  |
| 5. O-doped surface .....                                                      | 10 |
| 5.1 $O_2$ and $H_2O$ adsorption on O-doped $HfS_2$ and $ZrS_2$ surfaces ..... | 10 |
| 5.2 O-doped $TiS_2$ surface .....                                             | 12 |
| 6. Edges .....                                                                | 13 |
| 6.1 $H_2O$ adsorption on edge M sites of $MS_2$ .....                         | 13 |
| 6.2 $O_2$ adsorption on edge M sites of $MS_2$ .....                          | 14 |
| 6.3 Formation of $TiO_x$ .....                                                | 15 |
| 7. Appendix .....                                                             | 16 |

# 1. Band structures of MS<sub>2</sub>

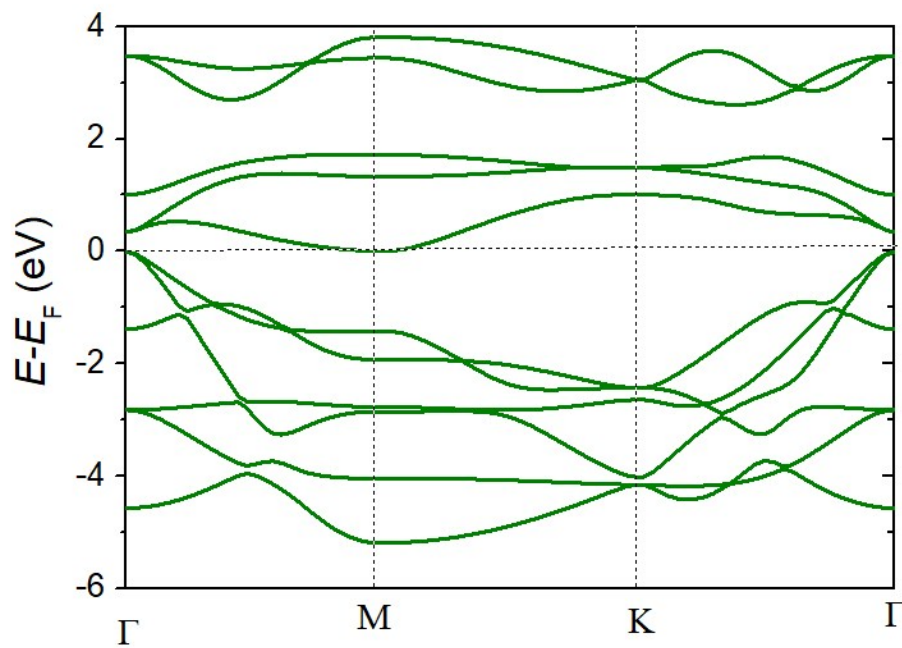

Figure S1. Band structure of TiS<sub>2</sub> at GGA-PBE level.

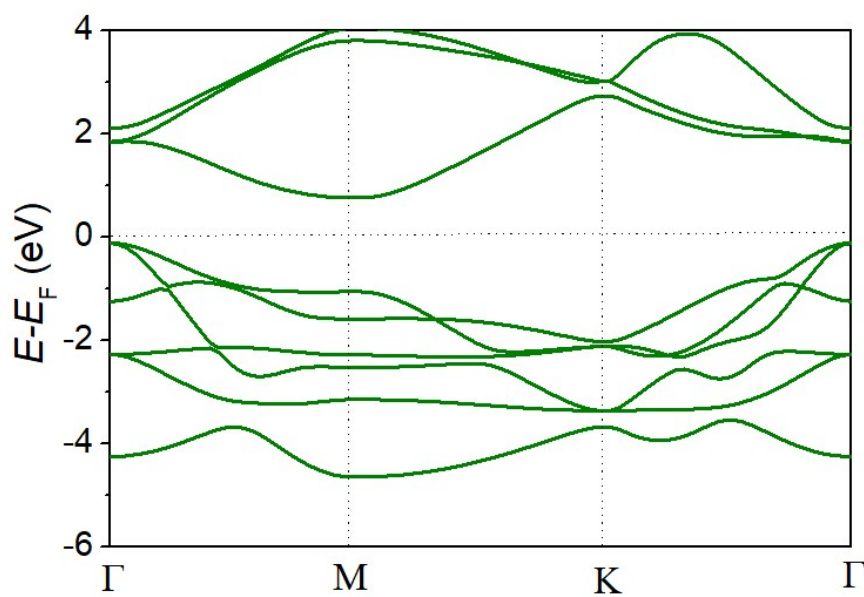

Figure S2. Band structure of ZrS<sub>2</sub> at GGA-PBE level.

## 2. Computational models

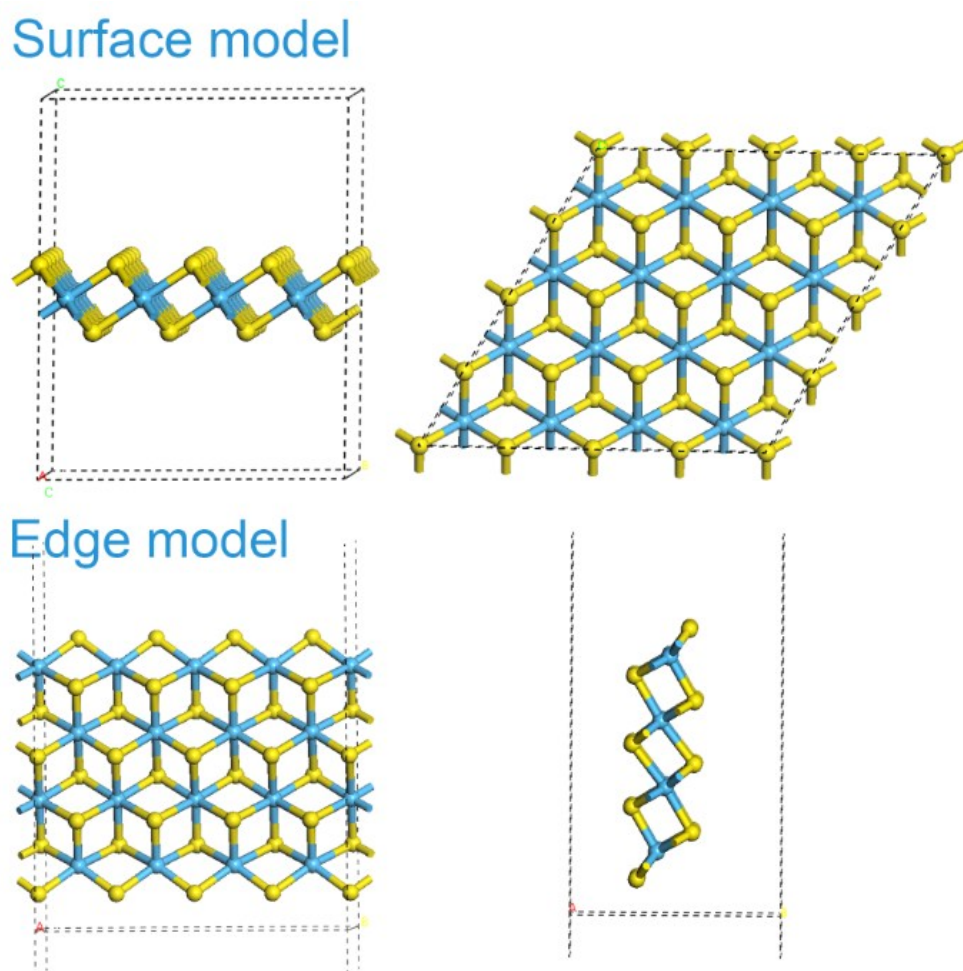

Figure S3. Computational models of  $\text{HfS}_2$  (same models are used for  $\text{TiS}_2$  and  $\text{ZrS}_2$ ) for the surface and edge (with 50% S coverage) calculations with cell size of  $4 \times 4$ .

### 3. Pristine surface

#### 3.1 H<sub>2</sub>O adsorption on pristine surfaces of MS<sub>2</sub>

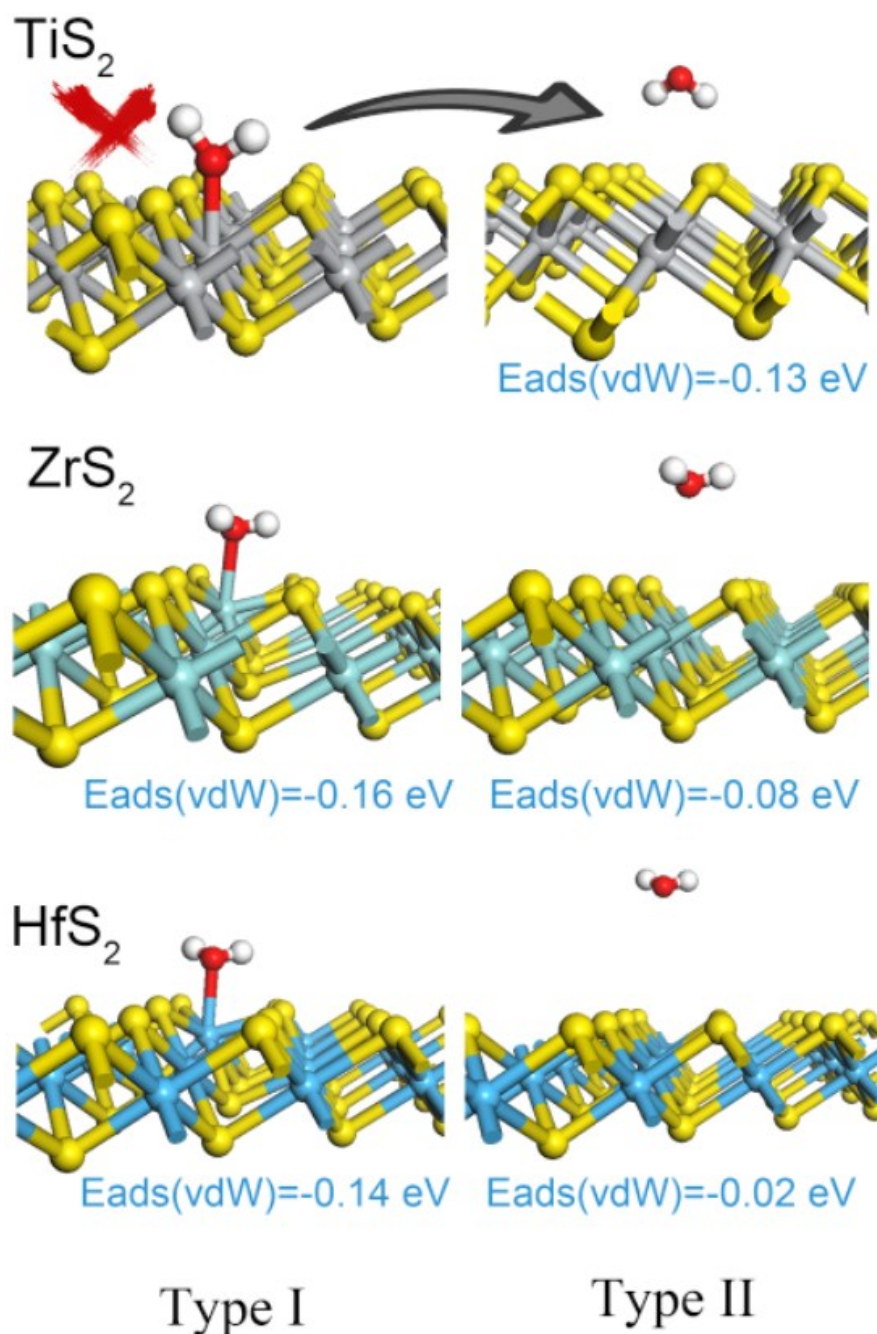

Figure S4. Adsorption structures and energies of H<sub>2</sub>O on pristine MS<sub>2</sub> (001) (M=Ti, Zr and Hf) surfaces. The vdW corrections are used by PBE+D2.

### 3.2 O<sub>2</sub> adsorption on pristine surfaces of MS<sub>2</sub>

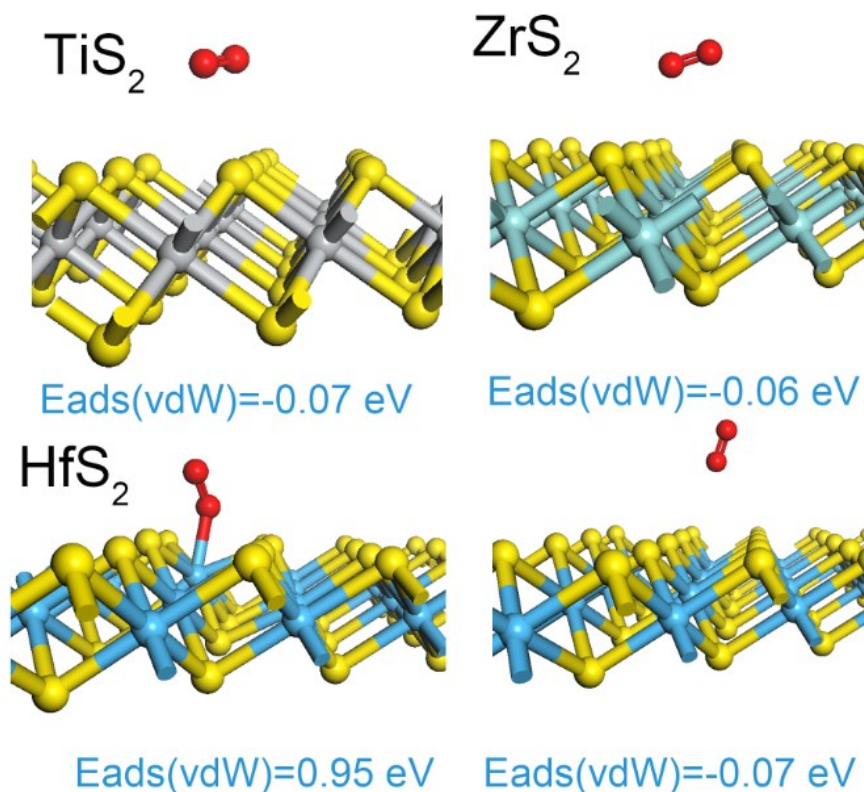

Figure S5. Adsorption structures and energies of O<sub>2</sub> on pristine MS<sub>2</sub> (001) (M=Ti, Zr and Hf) surfaces. The vdW corrections are used by PBE+D2.

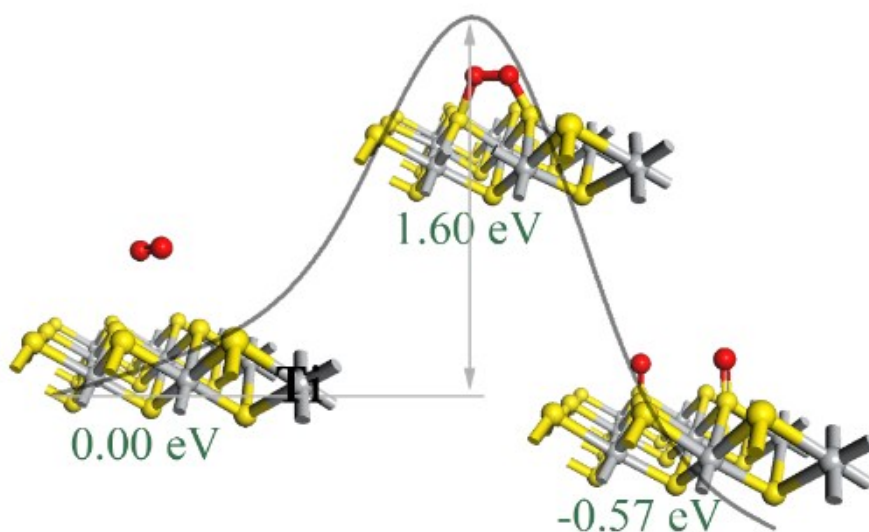

Figure S6. Direct surface oxidation on pristine TiS<sub>2</sub> (001) surface, Ti, S and O are marked in grey, yellow and red respectively.

## 4. Sulfur vacancy

### 4.1 H<sub>2</sub>O adsorption on sulfur vacancy sites of MS<sub>2</sub>

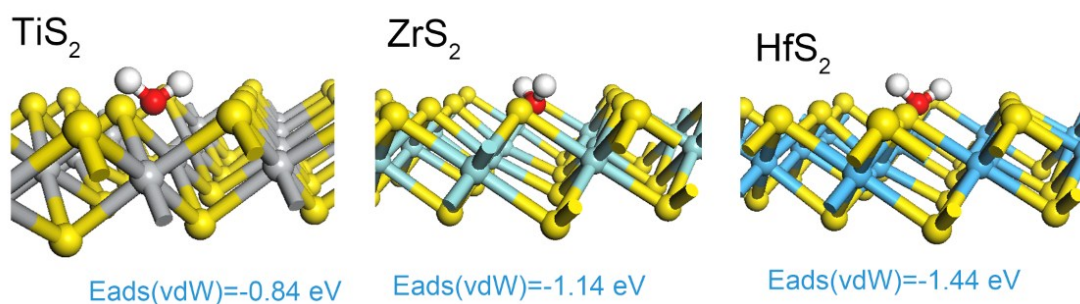

Figure S7. Adsorption structures and energies of H<sub>2</sub>O on a sulfur vacancy site of MS<sub>2</sub> (001) (M=Ti, Zr and Hf) surfaces. The vdW corrections are used by PBE+D2.

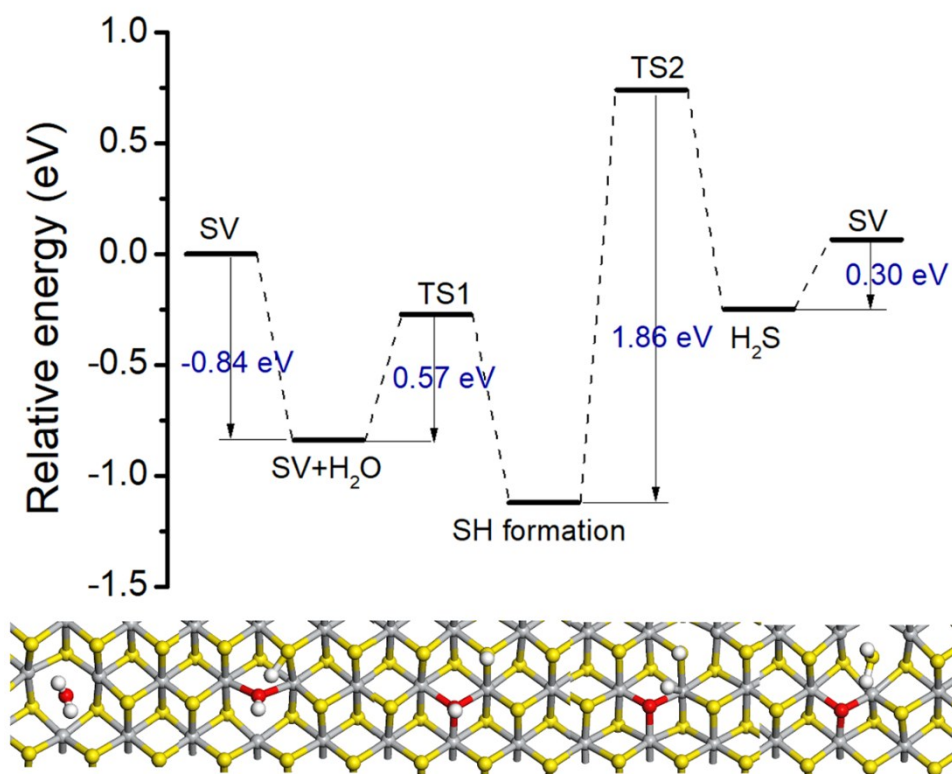

Figure S8. Proposed reaction pathway of water oxidation process at a TiS<sub>2</sub> surface vacancy site, the numbers in blue are calculated kinetic barriers for SH formation and H<sub>2</sub>S formation.

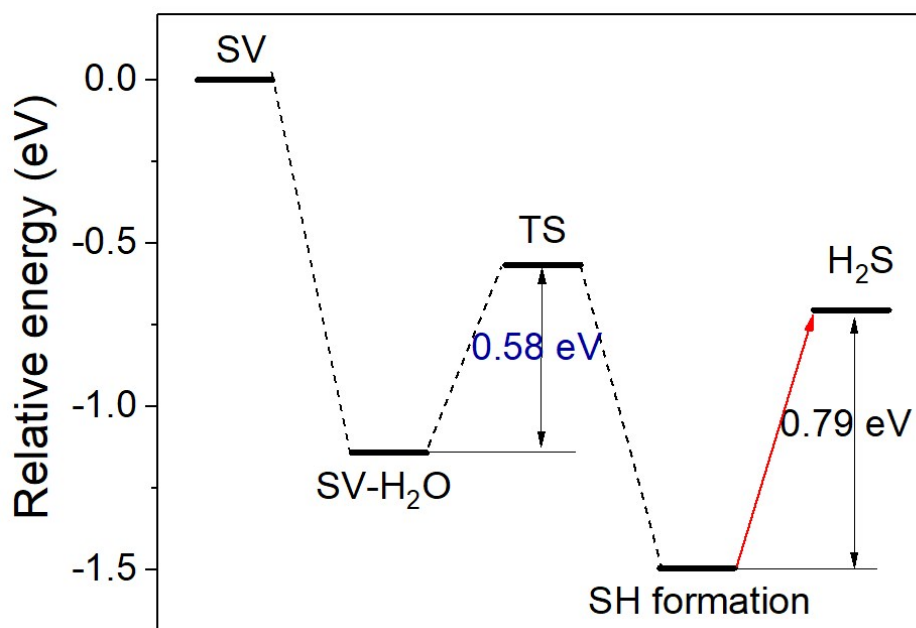

Figure S9. Proposed reaction pathway of water oxidation process at a  $\text{ZrS}_2$  surface vacancy site. The number in blue is calculated kinetic barrier for SH formation. The formation of  $\text{H}_2\text{S}$  is energy unfavorable by 0.79 eV. The structures are very similar with the case of  $\text{HfS}_2$  as shown in Figure 2b.

## 4.2 $\text{O}_2$ adsorption on sulfur vacancy sites of $\text{MS}_2$

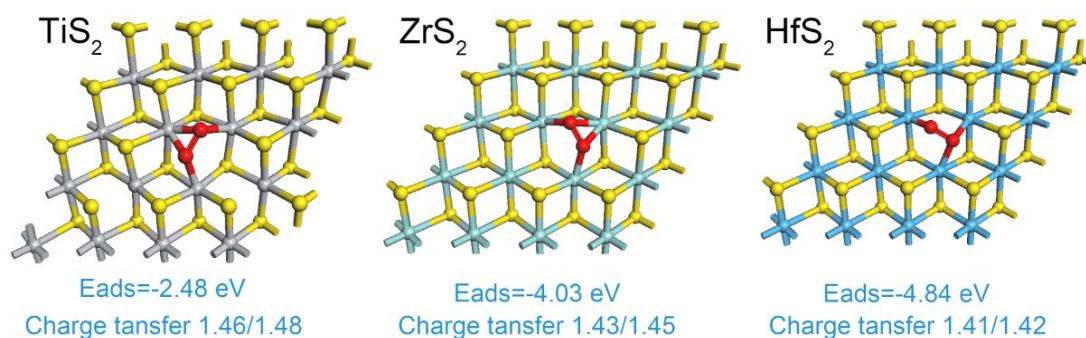

Figure S10. Adsorption structures and energies of  $\text{O}_2$  on a sulfur vacancy site of  $\text{MS}_2$  (001) ( $\text{M}=\text{Ti}$ ,  $\text{Zr}$  and  $\text{Hf}$ ) surfaces. The vdW corrections are used by PBE+D2. Charge transfer from  $\text{O}_2$  to  $\text{MS}_2$  is analyzed by Bader charge analysis.



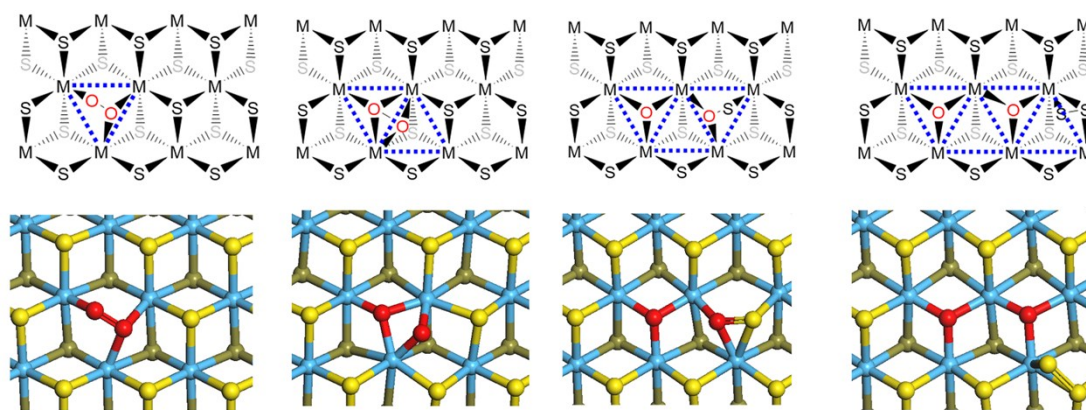

Figure S11. Structure evolution of  $O_2$  adsorbed at a sulfur vacancy site. The structures shown in the Figure are examples from  $HfS_2$ , but can be applied to  $TiS_2$  and  $ZrS_2$  as well.

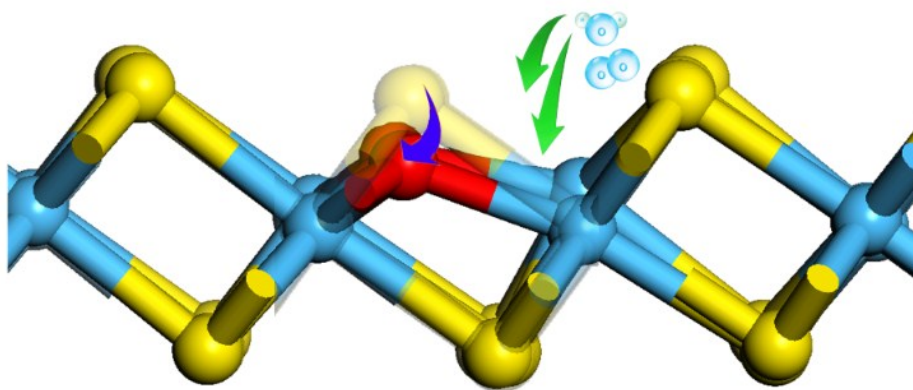

Figure S12. The shrink of lattice site into the inner part of the  $MS_2$  comparing with initial S site (shaded yellow) by O substitution, and  $O_2$  and  $H_2O$  may attack these surrounding metals.

## 5. O-doped surface

### 5.1 O<sub>2</sub> and H<sub>2</sub>O adsorption on O-doped HfS<sub>2</sub> and ZrS<sub>2</sub> surfaces

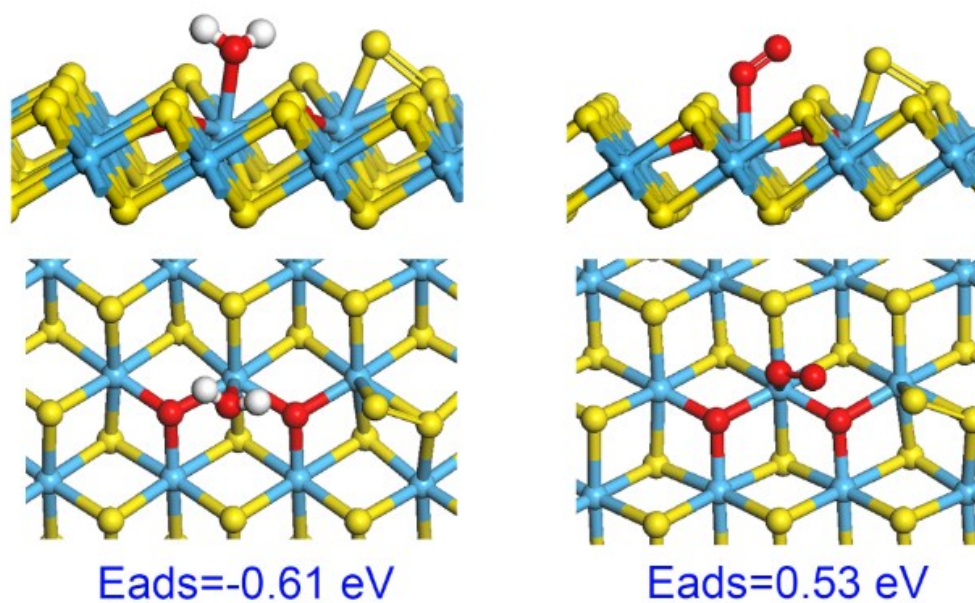

Figure S13. Side and top views of H<sub>2</sub>O (left side) and O<sub>2</sub> (right side) adsorption on an O-doped HfS<sub>2</sub> surface.

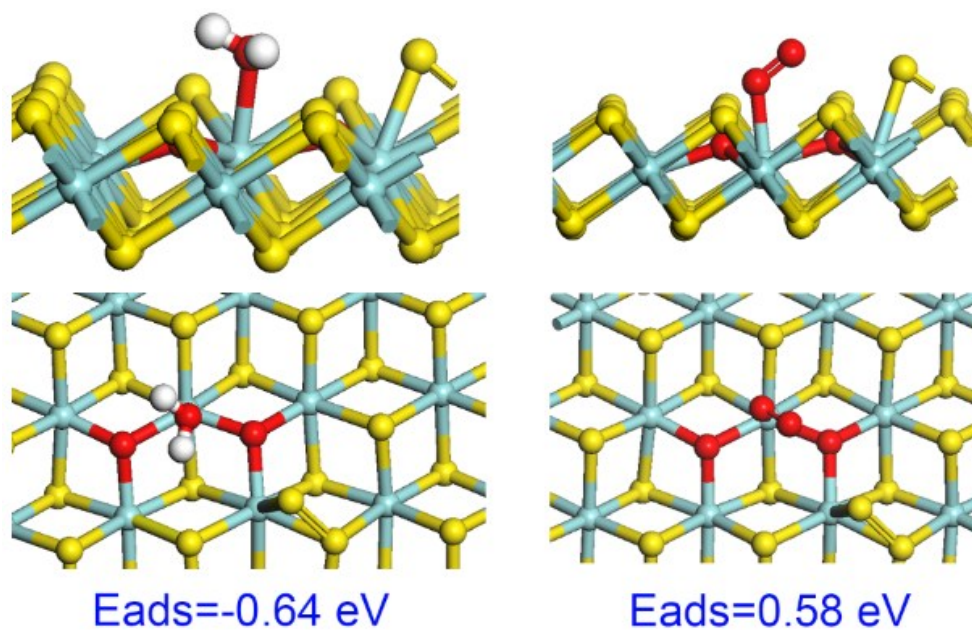

Figure S14. Side and top views of H<sub>2</sub>O (left side) and O<sub>2</sub> (right side) adsorption on an O-doped ZrS<sub>2</sub>

surface.

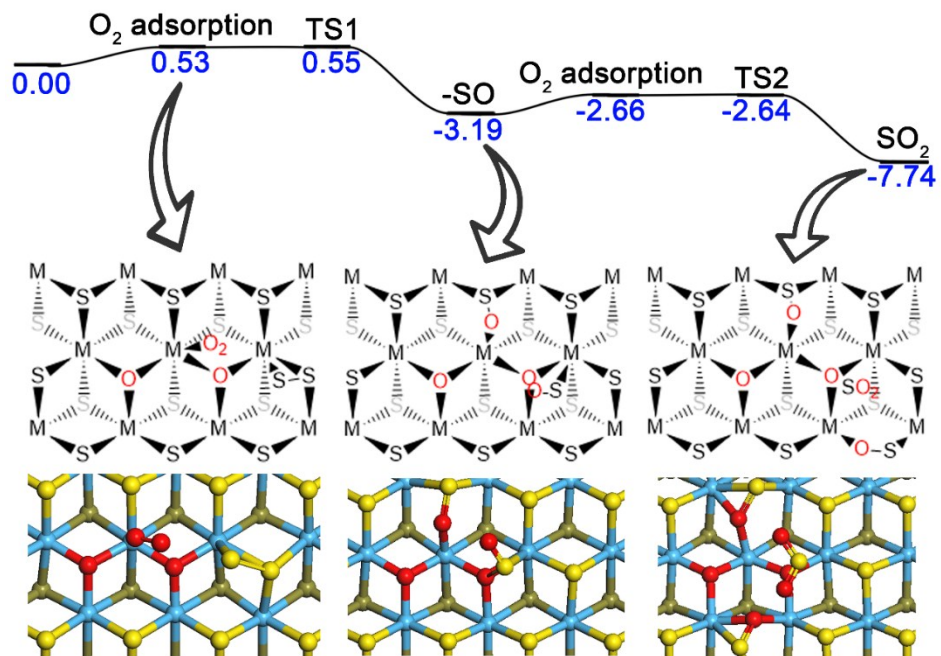

Figure S15. Proposed reaction pathway of O<sub>2</sub> induced oxidation on an O doped HfS<sub>2</sub> surface.

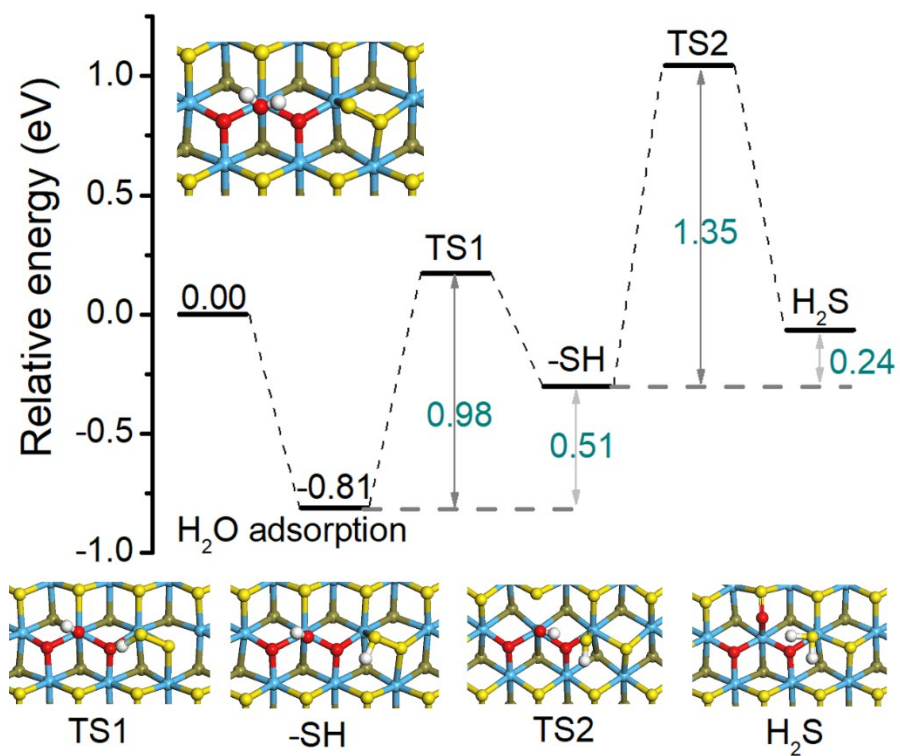

Figure S16. Proposed reaction pathway of H<sub>2</sub>O induced oxidation on an O doped HfS<sub>2</sub> surface.

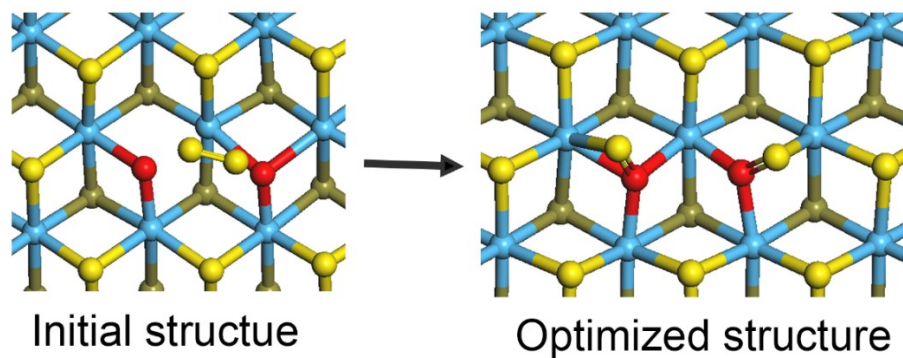

Figure S17. Geometry optimization of an S<sub>2</sub> dimer on the O doped HfS<sub>2</sub> surface.

## 5.2 O-doped TiS<sub>2</sub> surface

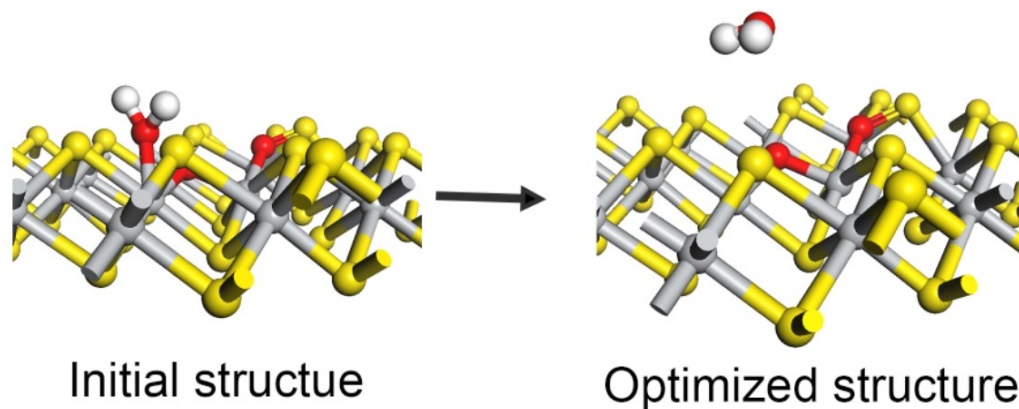

Figure S18. Geometry optimization of H<sub>2</sub>O adsorption on an O doped TiS<sub>2</sub> surface and similar results can be found for non-polar O<sub>2</sub> adsorption.

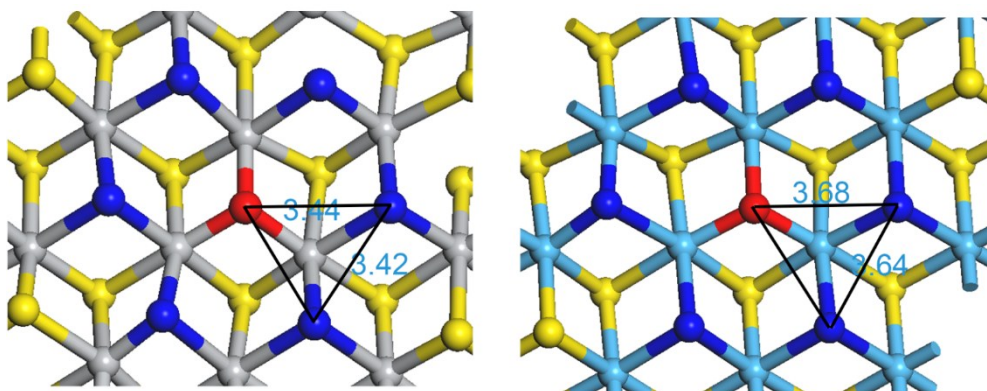

Figure S19. The steric effect on  $\text{TiS}_2$  comparing with  $\text{HfS}_2$ , all the sulfur atoms surrounding the doped O are marked in blue. The units of distance are in Å.

## 6. Edges

### 6.1 $\text{H}_2\text{O}$ adsorption on edge M sites of $\text{MS}_2$

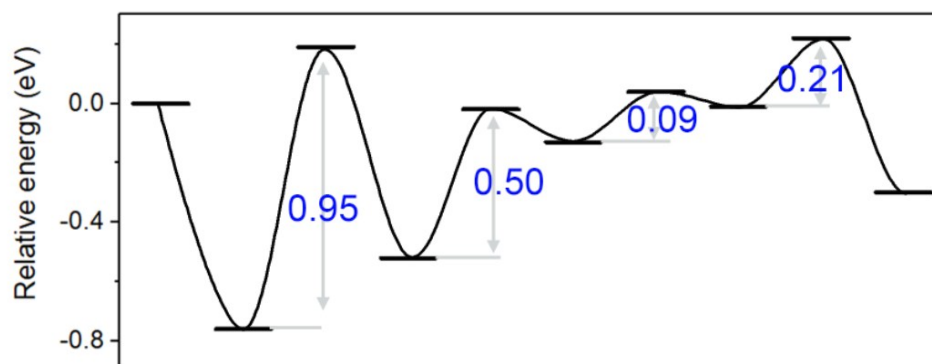

Figure 20. Proposed reaction pathways of  $\text{H}_2\text{O}$  induced oxidation at  $\text{TiS}_2$  edge sites with 50% S coverage. The numbers denote for energy barriers of each step. All the energies and kinetic barriers are obtained from ref. 16 [*J. Phys. Chem. C* **2015**, 119, 15707].

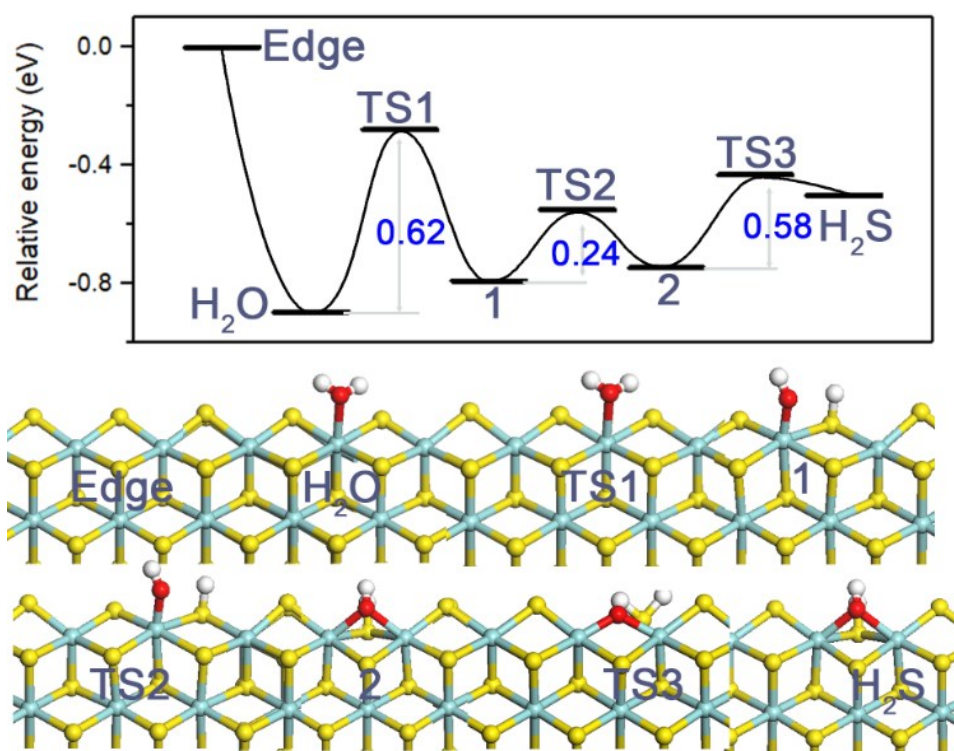

Figure 21. Proposed reaction pathways of  $\text{H}_2\text{O}$  induced oxidation at  $\text{ZrS}_2$  edge sites with 50% S coverage. The numbers denote for energy barriers of each step.

## 6.2 $\text{O}_2$ adsorption on edge M sites of $\text{MS}_2$

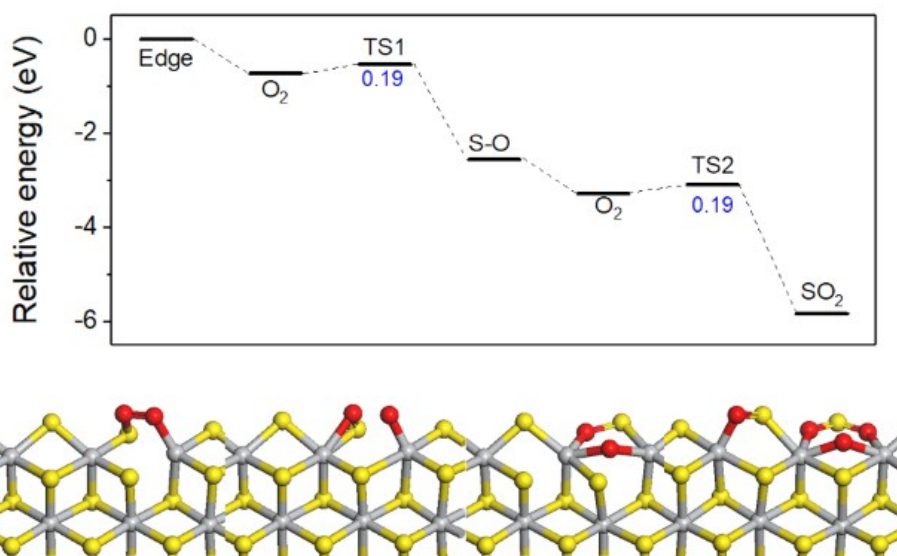

Figure 22. Proposed reaction pathways of  $\text{O}_2$  induced oxidation at  $\text{TiS}_2$  edge sites with 50% S coverage. The numbers denote for energy barriers of each step.

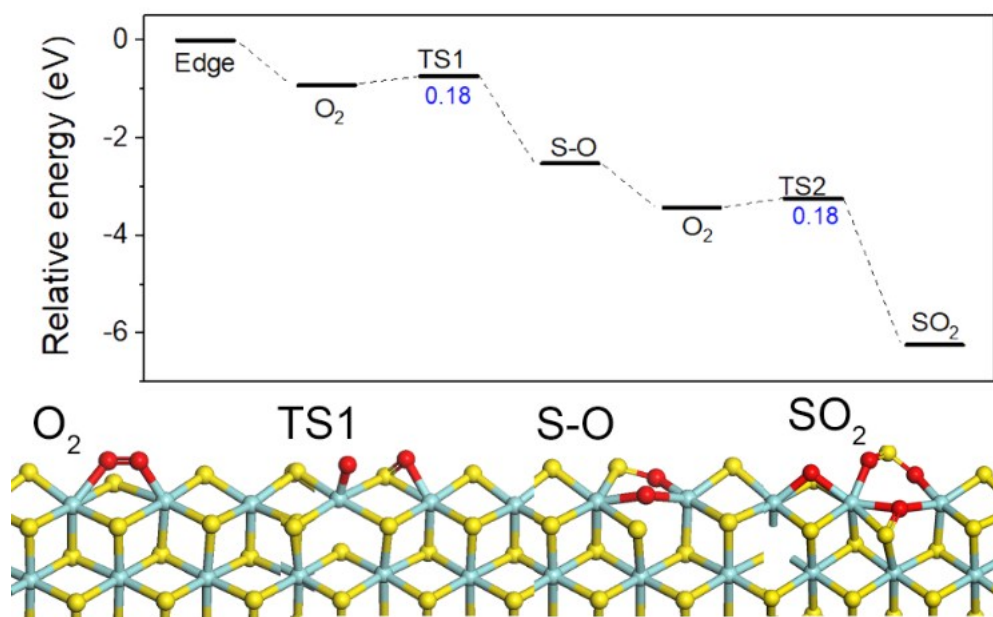

Figure 23. Proposed reaction pathways of O<sub>2</sub> induced oxidation at ZrS<sub>2</sub> edge sites with 50% S coverage. The numbers denote for energy barriers of each step.

### 6.3 Formation of TiO<sub>x</sub>

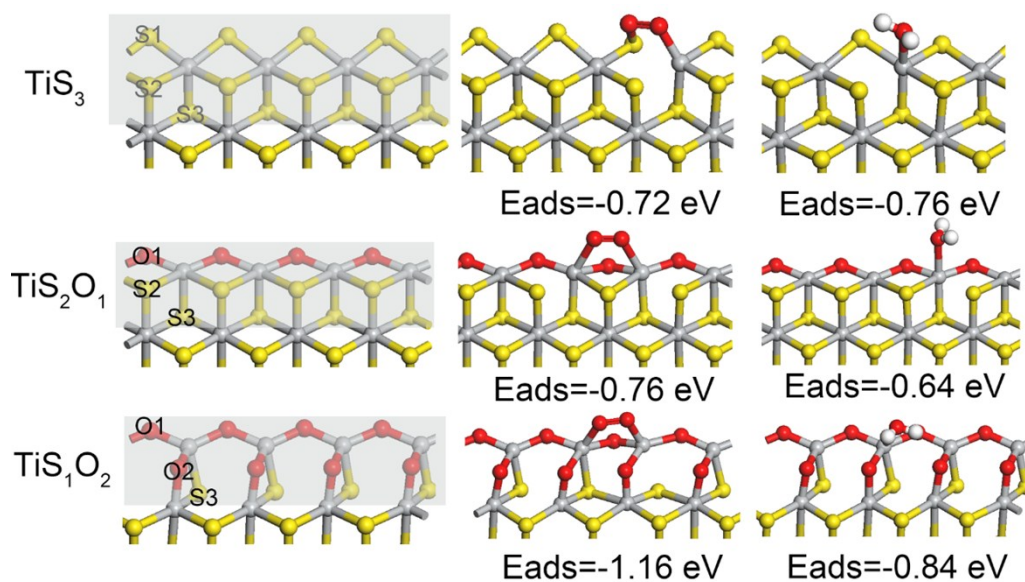

Figure 24. The adsorption of O<sub>2</sub> and H<sub>2</sub>O at oxidized TiS<sub>2</sub> edge, the x ranges from 0-2, denotes as TiS<sub>3</sub>, TiS<sub>2</sub>O<sub>1</sub> and TiS<sub>1</sub>O<sub>2</sub> respectively. The oxidized area is in shadow and TiO<sub>3</sub> can be seen in Figure 4 from the main text.

## 7. Appendix

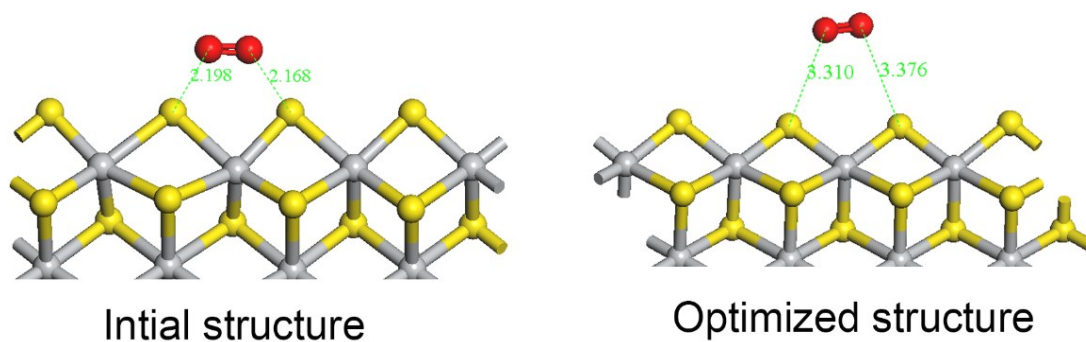

Figure 25. O<sub>2</sub> adsorption on TiS<sub>2</sub> S edge sites with 50% S coverage.

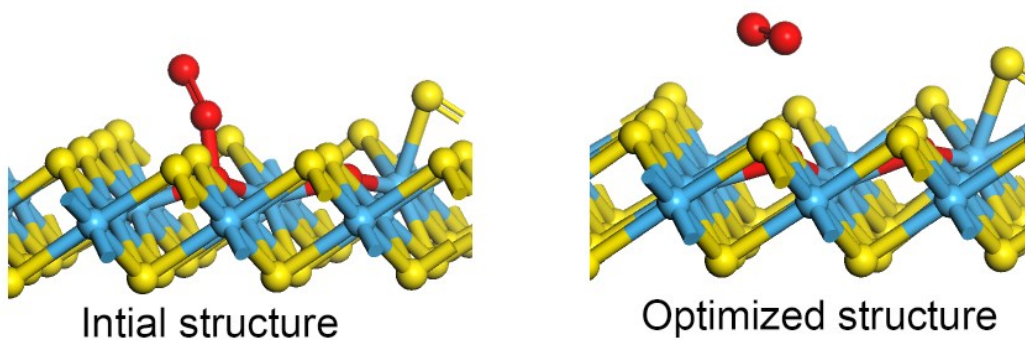

Figure 26. O<sub>2</sub> adsorption on an O-doped HfS<sub>2</sub> surface.

Table S1. Bond length of M-S in pristine MS<sub>2</sub>, and M-O in O doped MS<sub>2</sub>.

| Bond length (Å) | M-S  | M-O  |
|-----------------|------|------|
| Hf              | 2.55 | 2.10 |
| Zr              | 2.57 | 2.13 |
| Ti              | 2.45 | 1.98 |



Table S2. Adsorption energies of O<sub>2</sub> and H<sub>2</sub>O on various sites of MS<sub>2</sub>, units are in eV. Adsorption structures can be seen in each part of the supporting information.

|                  | MS <sub>2</sub>  | O <sub>2</sub> | H <sub>2</sub> O |
|------------------|------------------|----------------|------------------|
| Pristine surface | TiS <sub>2</sub> | -0.07          | -0.06            |
|                  | ZrS <sub>2</sub> | -0.06          | -0.16            |
|                  | HfS <sub>2</sub> | -0.07          | -0.14            |
| Sulfur vacancy   | TiS <sub>2</sub> | -2.48          | -0.84            |
|                  | ZrS <sub>2</sub> | -4.03          | -1.14            |
|                  | HfS <sub>2</sub> | -4.84          | -1.44            |
| O-doped surface  | TiS <sub>2</sub> | -0.07          | -0.06            |
|                  | ZrS <sub>2</sub> | 0.53           | -0.61            |
|                  | HfS <sub>2</sub> | 0.58           | -0.64            |
| edge             | TiS <sub>2</sub> | -0.72          | -0.76            |
|                  | ZrS <sub>2</sub> | -0.92          | -0.90            |
|                  | HfS <sub>2</sub> | -0.42          | -1.11            |
